# Supplementary material for: Potassic-Hastingsite from the Kedrovy District (East Siberia, Russia): Petrographic Description, Crystal Chemistry, Spectroscopy, and Thermal Behavior
Source: MDPI journal article supplement (doi:10.3390/min11101049), 2021-09-27
Supplement: s1 [file s1]

# Supplementary materials

## Potassic-Hastingsite from the Kedrovyy District (East Siberia, Russia): Petrographic Description, Crystal Chemistry, Spectroscopy, and Thermal Behavior

Ekaterina Kaneva<sup>1,2,\*</sup>, Tatiana Radomskaya<sup>1,2</sup>, Roman Shendrik<sup>1</sup>, Victor Chubarov<sup>1</sup> and Victoria Danilovsky<sup>3</sup>

<sup>1</sup> Vinogradov Institute of Geochemistry, Siberian Branch of the Russian Academy of Sciences, Irkutsk, 664033, Russia; taniaojigova@mail.ru (T.R.); r.shendrik@gmail.com (R.S); chubarov@igc.irk.ru (V.C)

<sup>2</sup> Department of Subsoil Use, Irkutsk National Research Technical University, Irkutsk, 664074, Russia

<sup>3</sup> Sobolev Institute of Geology and Mineralogy, Siberian Branch of the Russian Academy of Sciences, Novosibirsk, 630090, Russia; victoria.saratovkina@gmail.com (V.D)

\* Correspondence: kev604@mail.ru

**Table S1.** Anisotropic atomic displacement parameters ( $\text{\AA}^2$ ) of potassic-hastingsite sample.

| Site | Atom                                                      | U11         | U22         | U33         | U23              | U13         | U12              |
|------|-----------------------------------------------------------|-------------|-------------|-------------|------------------|-------------|------------------|
| A    | K <sup>+</sup>                                            | 0.0603(5)   | 0.0299(5)   | 0.0821(6)   | 0                | 0.0591(5)   | 0                |
| A2   | K <sup>+</sup>                                            | 0.0603(5)   | 0.0299(5)   | 0.0821(6)   | 0                | 0.0591(5)   | 0                |
| M1   | Fe <sup>2+</sup>                                          | 0.01577(12) | 0.01636(11) | 0.01176(11) | 0                | 0.00493(9)  | 0                |
| M2   | Fe <sup>2+</sup> , Fe <sup>3+</sup> ,<br>Mg <sup>2+</sup> | 0.01278(12) | 0.01145(12) | 0.01104(12) | 0                | 0.003644(8) | 0                |
| M3   | Fe <sup>2+</sup>                                          | 0.01548(16) | 0.01188(15) | 0.01265(15) | 0                | 0.00245(12) | 0                |
| M4   | Ca <sup>2+</sup>                                          | 0.01854(16) | 0.01422(15) | 0.01723(16) | 0                | 0.00921(12) | 0                |
| T1   | Si <sup>4+</sup> , Al <sup>3+</sup>                       | 0.01169(14) | 0.01151(14) | 0.00990(14) | -<br>0.00012(11) | 0.00276(11) | -<br>0.00072(11) |
| T2   | Si <sup>4+</sup>                                          | 0.01184(14) | 0.01123(13) | 0.00989(14) | 0.00031(11)      | 0.00359(10) | -<br>0.00057(11) |
| O1   | O <sup>2-</sup>                                           | 0.0144(4)   | 0.0164(4)   | 0.0121(4)   | -0.0012(3)       | 0.0036(3)   | -0.0019(3)       |
| O2   | O <sup>2-</sup>                                           | 0.0121(3)   | 0.0158(4)   | 0.0132(4)   | 0.0002(3)        | 0.0028(3)   | 0.0002(3)        |
| O3   | O <sup>2-</sup> , F <sup>-</sup>                          | 0.0116(5)   | 0.0149(5)   | 0.0134(5)   | 0                | 0.0020(5)   | 0                |
|      | Cl <sup>-</sup>                                           | 0.0179(5)   | 0.0146(5)   | 0.0141(5)   | 0                | 0.0050(4)   | 0                |
| O4   | O <sup>2-</sup>                                           | 0.0195(4)   | 0.0143(4)   | 0.0155(4)   | -0.0012(3)       | 0.0075(3)   | -0.0030(3)       |
| O5   | O <sup>2-</sup>                                           | 0.0146(4)   | 0.0185(4)   | 0.0132(4)   | 0.0052(3)        | 0.0031(3)   | 0.0007(3)        |
| O6   | O <sup>2-</sup>                                           | 0.0154(4)   | 0.0181(4)   | 0.0154(4)   | -0.0042(3)       | 0.0047(3)   | 0.0007(3)        |
| O7   | O <sup>2-</sup>                                           | 0.0180(5)   | 0.0185(5)   | 0.0225(6)   | 0                | 0.0059(5)   | 0                |

**Table S2.** Unit cell parameters of the studied potassic-hastingsite as a function of T.

| T (°C) | <i>a</i> (Å) | <i>b</i> (Å) | <i>c</i> (Å) | $\beta$ (°) | <i>V</i> (Å <sup>3</sup> ) |
|--------|--------------|--------------|--------------|-------------|----------------------------|
| 30     | 9.975(2)     | 18.282(5)    | 5.364(2)     | 104.97(3)   | 944.9(4)                   |
| 50     | 9.977(2)     | 18.294(5)    | 5.359(2)     | 104.93(3)   | 945.0(4)                   |
| 100    | 9.985(2)     | 18.304(5)    | 5.358(2)     | 104.98(3)   | 946.1(4)                   |
| 150    | 9.986(2)     | 18.308(5)    | 5.364(2)     | 104.95(3)   | 947.4(4)                   |
| 200    | 9.992(2)     | 18.312(5)    | 5.366(2)     | 104.92(3)   | 948.7(4)                   |
| 250    | 9.997(2)     | 18.319(5)    | 5.365(2)     | 104.90(3)   | 949.4(4)                   |
| 300    | 9.998(2)     | 18.325(5)    | 5.364(2)     | 104.83(3)   | 949.9(4)                   |
| 350    | 10.001(2)    | 18.337(5)    | 5.364(2)     | 104.88(3)   | 950.9(4)                   |
| 400    | 9.998(2)     | 18.336(5)    | 5.363(2)     | 104.81(3)   | 950.5(4)                   |
| 450    | 9.995(2)     | 18.342(5)    | 5.361(2)     | 104.82(3)   | 950.2(4)                   |
| 500    | 9.992(2)     | 18.359(5)    | 5.358(2)     | 105.07(3)   | 949.0(4)                   |
| 550    | 9.979(2)     | 18.372(5)    | 5.352(2)     | 105.12(3)   | 947.2(4)                   |
| 600    | 9.957(2)     | 18.354(5)    | 5.350(2)     | 104.96(3)   | 944.6(4)                   |
| 650    | 9.952(2)     | 18.357(5)    | 5.353(2)     | 104.96(3)   | 944.8(4)                   |
| 700    | 9.949(2)     | 18.351(5)    | 5.355(2)     | 104.93(3)   | 944.7(4)                   |
| 750    | 9.948(2)     | 18.327(5)    | 5.363(2)     | 104.91(3)   | 944.9(4)                   |
| 700    | 9.941(2)     | 18.307(5)    | 5.355 (2)    | 104.96(3)   | 941.5(4)                   |
| 600    | 9.927(2)     | 18.269(5)    | 5.355(2)     | 104.88(3)   | 938.5(4)                   |
| 500    | 9.914(2)     | 18.266(5)    | 5.355(2)     | 104.89(3)   | 937.1(4)                   |
| 400    | 9.906(2)     | 18.254(4)    | 5.354(2)     | 104.97(3)   | 935.1(4)                   |
| 300    | 9.898(2)     | 18.253(5)    | 5.345(2)     | 105.05(3)   | 932.6(4)                   |
| 200    | 9.887(2)     | 18.252(5)    | 5.334(2)     | 105.05(3)   | 929.5(4)                   |
| 100    | 9.876(2)     | 18.236(4)    | 5.336(2)     | 105.02(3)   | 928.3(4)                   |
| 30     | 9.870(2)     | 18.207(4)    | 5.331(2)     | 105.03(3)   | 925.4(4)                   |

**Table S3.** X-ray powder diffraction data *vs* temperature for studied potassic-hastingsite.

| <i>hkl</i>  | 30 °C    |          | 50 °C    |          | 100 °C   |          | 150 °C   |          | 200 °C   |          | 250 °C   |          | 300 °C   |          | 350 °C   |          | 400 °C   |          | 450 °C   |          | 500 °C   |          | 550 °C   |          |
|-------------|----------|----------|----------|----------|----------|----------|----------|----------|----------|----------|----------|----------|----------|----------|----------|----------|----------|----------|----------|----------|----------|----------|----------|----------|
|             | <i>I</i> | <i>d</i> |
| 110         | 100      | 8.560    | 100      | 8.574    | 100      | 8.853    | 100      | 8.571    | 100      | 8.583    | 100      | 8.594    | 100      | 8.597    | 100      | 8.589    | 100      | 8.581    | 100      | 8.599    | 100      | 8.582    | 100      | 8.583    |
| 200         | 7        | 4.835    | 7        | 4.827    | 8        | 4.831    | 8        | 4.836    | 7        | 4.842    | 7        | 4.849    | 8        | 4.832    | 7        | 4.838    | 8        | 4.843    | 7        | 4.833    | 6        | 4.835    | 6        | 4.821    |
| 040         | 5        | 4.572    | 4        | 4.582    | 5        | 4.588    | 6        | 4.585    | 5        | 4.592    | 4        | 4.599    | 5        | 4.600    | 4        | 4.600    | 4        | 4.587    | 3        | 4.586    | 3        | 4.590    | 4        | 4.598    |
| 150         | 6        | 3.430    | 6        | 3.426    | 5        | 3.427    | 5        | 3.428    | 4        | 3.435    | 5        | 3.435    | 5        | 3.432    | 5        | 3.431    | 5        | 3.435    | 3        | 3.433    | 3        | 3.438    | 5        | 3.426    |
| 240         | 10       | 3.319    | 11       | 3.319    | 10       | 3.324    | 9        | 3.326    | 10       | 3.324    | 11       | 3.327    | 10       | 3.328    | 12       | 3.331    | 9        | 3.331    | 11       | 3.329    | 11       | 3.328    | 10       | 3.322    |
| 310         | 35       | 3.166    | 36       | 3.166    | 35       | 3.169    | 36       | 3.170    | 35       | 3.173    | 33       | 3.175    | 36       | 3.175    | 33       | 3.177    | 33       | 3.176    | 32       | 3.175    | 27       | 3.171    | 28       | 3.165    |
| $\bar{3}11$ | 5        | 3.083    | 4        | 3.087    | 4        | 3.085    | 4        | 3.092    | 4        | 3.085    | 3        | 3.091    | 3        | 3.089    | 3        | 3.089    | 3        | 3.090    | 4        | 3.091    | 3        | 3.085    |          |          |
| 221         | 3        | 2.980    | 4        | 2.977    | 3        | 2.979    | 5        | 2.986    | 3        | 2.980    | 4        | 2.979    | 4        | 2.988    | 5        | 2.982    | 3        | 2.983    | 4        | 2.982    | 3        | 2.980    | 3        | 2.979    |
| 330         | 19       | 2.844    | 20       | 2.844    | 15       | 2.846    | 12       | 2.847    | 13       | 2.849    | 12       | 2.849    | 12       | 2.850    | 12       | 2.851    | 11       | 2.851    | 11       | 2.852    | 10       | 2.849    | 10       | 2.847    |
| 151         | 19       | 2.743    | 19       | 2.742    | 18       | 2.743    | 19       | 2.743    | 16       | 2.746    | 16       | 2.746    | 14       | 2.750    | 16       | 2.749    | 14       | 2.748    | 15       | 2.750    | 16       | 2.749    | 15       | 2.747    |
| 061         | 5        | 2.630    | 6        | 2.634    | 6        | 2.633    | 5        | 2.634    | 5        | 2.633    | 5        | 2.635    | 5        | 2.633    | 6        | 2.636    | 7        | 2.637    | 7        | 2.635    | 7        | 2.636    | 7        | 2.636    |
| 400         | 10       | 2.413    | 8        | 2.414    | 8        | 2.417    | 7        | 2.414    | 7        | 2.417    | 6        | 2.418    | 5        | 2.419    | 5        | 2.420    | 6        | 2.419    | 7        | 2.420    | 5        | 2.418    | 7        | 2.417    |
| $35\bar{1}$ | 5        | 2.372    | 4        | 2.370    | 6        | 2.372    | 6        | 2.371    | 5        | 2.373    | 5        | 2.372    | 4        | 2.373    | 4        | 2.372    | 3        | 2.373    | 4        | 2.372    |          |          |          |          |
| 171         | 7        | 2.190    | 8        | 2.190    | 8        | 2.191    | 9        | 2.193    | 8        | 2.193    | 9        | 2.194    | 9        | 2.194    | 6        | 2.196    | 4        | 2.198    | 4        | 2.189    |          |          |          |          |
| 202         | 5        | 2.045    | 3        | 2.044    | 4        | 2.089    | 3        | 2.080    | 3        | 2.056    | 4        | 2.045    | 7        | 2.048    | 5        | 2.049    | 4        | 2.049    | 7        | 2.049    |          |          |          |          |
| 461         | 7        | 1.670    | 6        | 1.671    | 6        | 1.672    | 3        | 1.672    | 5        | 1.673    | 6        | 1.673    | 7        | 1.676    | 3        | 1.702    | 5        | 1.676    | 6        | 1.664    | 6        | 1.667    | 8        | 1.667    |
| 480         | 6        | 1.658    | 3        | 1.658    | 5        | 1.658    |          |          |          |          |          |          |          |          |          |          |          |          |          |          |          |          |          |          |
| 600         | 5        | 1.605    | 4        | 1.605    | 6        | 1.606    | 5        | 1.608    | 6        | 1.609    | 7        | 1.609    | 3        | 1.610    | 3        | 1.610    | 5        | 1.611    | 3        | 1.605    | 4        | 1.604    | 3        | 1.603    |
| 402         | 4        | 1.572    | 5        | 1.572    | 5        | 1.573    | 4        | 1.574    |          |          |          |          |          |          |          |          |          |          |          |          |          |          |          |          |
| $26\bar{3}$ | 7        | 1.524    | 3        | 1.524    | 5        | 1.525    | 6        | 1.522    | 4        | 1.524    | 7        | 1.524    | 6        | 1.526    | 4        | 1.526    | 3        | 1.520    | 3        | 1.522    | 5        | 1.525    |          |          |
| $66\bar{1}$ | 8        | 1.457    | 8        | 1.459    | 8        | 1.459    | 7        | 1.458    | 7        | 4.460    | 5        | 1.460    | 5        | 1.462    | 6        | 1.463    | 3        | 1.463    | 5        | 1.459    | 3        | 1.459    | 3        | 1.459    |

Table S3. (contd.)

| <i>hkl</i>   | 600 °C   |          | 650 °C   |          | 700 °C   |          | 750 °C   |          | 700 °C   |          | 600 °C   |          | 500 °C   |          | 400 °C   |          | 300 °C   |          | 200 °C   |          | 100 °C   |          | 30 °C    |          |
|--------------|----------|----------|----------|----------|----------|----------|----------|----------|----------|----------|----------|----------|----------|----------|----------|----------|----------|----------|----------|----------|----------|----------|----------|----------|
|              | <i>I</i> | <i>d</i> |
| 110          | 100      | 8.561    | 100      | 8.568    | 100      | 8.563    | 100      | 8.559    | 100      | 8.534    | 100      | 8.537    | 100      | 8.532    | 100      | 8.511    | 100      | 8.516    | 100      | 8.499    | 100      | 8.501    | 100      | 8.489    |
| 200          | 6        | 4.822    | 7        | 4.816    | 7        | 4.814    | 8        | 4.818    | 7        | 4.809    | 7        | 4.811    | 8        | 4.802    | 8        | 4.793    | 8        | 4.794    | 8        | 4.788    | 7        | 4.777    | 7        | 4.777    |
| 040          | 4        | 4.599    | 3        | 4.596    | 3        | 4.594    | 4        | 4.590    | 3        | 4.590    | 3        | 4.592    | 4        | 4.590    | 5        | 4.576    | 4        | 4.575    | 4        | 4.573    | 5        | 4.574    | 5        | 4.562    |
| 150          | 5        | 3.418    | 3        | 3.418    | 4        | 3.419    | 3        | 3.417    | 6        | 3.417    | 6        | 3.414    | 6        | 3.411    | 6        | 3.413    | 7        | 3.411    | 5        | 3.406    | 5        | 3.409    | 6        | 3.404    |
| 240          | 10       | 3.322    | 11       | 3.324    | 10       | 3.322    | 9        | 3.320    | 10       | 3.318    | 10       | 3.313    | 11       | 3.310    | 10       | 3.308    | 11       | 3.303    | 10       | 3.298    | 9        | 3.298    | 10       | 3.295    |
| 310          | 28       | 3.160    | 31       | 3.159    | 30       | 3.160    | 39       | 3.160    | 36       | 3.156    | 37       | 3.151    | 39       | 3.147    | 36       | 3.144    | 38       | 3.142    | 33       | 3.137    | 33       | 3.134    | 34       | 3.133    |
| $\bar{3}11$  |          |          |          |          |          |          |          |          |          |          |          |          |          |          |          |          |          |          |          |          |          |          |          |          |
| 221          | 3        | 2.977    |          |          |          |          |          |          |          |          |          |          |          |          | 3        | 2.958    | 3        | 2.958    |          |          |          |          |          |          |
| 330          | 10       | 2.845    | 10       | 2.842    | 8        | 2.841    | 9        | 2.842    | 10       | 2.839    | 11       | 2.835    | 12       | 2.835    | 11       | 2.828    | 12       | 2.828    | 13       | 2.823    | 13       | 2.822    | 14       | 2.817    |
| 151          | 15       | 2.746    | 13       | 2.746    | 9        | 2.744    | 12       | 2.745    | 14       | 2.742    | 14       | 2.741    | 15       | 2.739    | 14       | 2.736    | 13       | 2.734    | 14       | 2.732    | 15       | 2.730    | 16       | 2.727    |
| 061          | 7        | 2.636    | 8        | 2.635    | 4        | 2.633    | 4        | 2.637    | 7        | 2.633    | 5        | 2.627    | 7        | 2.629    | 6        | 2.626    | 6        | 2.623    | 6        | 2.621    | 5        | 2.620    | 6        | 2.618    |
| 400          | 7        | 2.413    | 5        | 2.413    | 6        | 2.413    | 5        | 2.413    | 5        | 2.413    | 6        | 2.411    | 6        | 2.403    | 6        | 2.402    | 5        | 2.399    | 7        | 2.399    | 6        | 2.393    | 7        | 2.396    |
| 35 $\bar{1}$ |          |          | 5        | 2.362    | 3        | 2.363    | 3        | 2.365    |          |          |          |          | 4        | 2.367    | 3        | 2.361    |          |          |          |          | 5        | 2.357    | 4        | 2.352    |
| 171          |          |          | 3        | 2.193    | 3        | 2.193    | 6        | 2.191    | 3        | 2.190    | 6        | 2.188    | 5        | 2.186    | 6        | 2.182    | 6        | 2.181    | 6        | 2.179    | 7        | 2.176    | 7        | 2.178    |
| 202          | 3        | 2.040    | 4        | 2.043    | 4        | 2.047    | 6        | 2.043    | 6        | 2.041    | 5        | 2.035    | 5        | 2.032    | 3        | 2.030    | 4        | 2.030    |          |          |          |          | 5        | 2.026    |
| 461          | 8        | 1.666    | 5        | 1.660    |          |          |          |          |          |          | 5        | 1.661    | 6        | 1.659    | 3        | 1.663    | 3        | 1.680    | 3        | 1.676    |          |          |          |          |
| 480          |          |          |          |          |          |          |          |          |          |          |          |          |          |          | 3        | 1.652    | 4        | 1.652    | 6        | 1.656    | 6        | 1.651    | 6        | 1.652    |
| 600          | 3        | 1.601    | 5        | 1.601    | 5        | 1.609    | 6        | 1.606    | 6        | 1.607    | 6        | 1.604    | 6        | 1.600    | 3        | 1.593    | 5        | 1.592    | 4        | 1.593    |          |          |          |          |
| 402          |          |          |          |          |          |          |          |          |          |          |          |          |          |          |          |          |          |          |          |          |          |          |          |          |
| 26 $\bar{3}$ |          |          |          |          |          |          |          |          |          |          | 3        | 1.532    | 5        | 1.530    | 3        | 1.518    | 4        | 1.527    |          |          |          |          |          |          |
| 66 $\bar{1}$ | 4        | 1.458    | 5        | 1.459    | 4        | 1.459    | 3        | 1.458    | 6        | 1.458    | 4        | 1.457    | 5        | 1.453    | 7        | 1.452    | 5        | 1.451    | 7        | 1.449    | 5        | 1.445    | 3        | 1.444    |

**Table S4.** Coefficients of thermal expansion tensor ( $\alpha_{ij}$ ) of the studied potassic-hastingsite as a function of T and orientation of its eigenvectors with respect to unit cell axes. For the monoclinic system  $\alpha_{12} = \alpha_{23} = 0$ ,  $\alpha_{31} = \alpha_{13}$ , while  $\text{EV1} \angle b = \text{EV2} \angle a = \text{EV3} \angle b = 90^\circ$  and  $\text{EV2} \angle b = 0^\circ$ ;  $\text{EV1} \angle e_2 = \text{EV2} \angle e_1 = \text{EV3} \angle e_2 = 90^\circ$  and  $\text{EV2} \angle e_2 = 0^\circ$ .

| T (°C) | $\alpha_{11}$          | $\alpha_{22}$          | $\alpha_{33}$          | $\alpha_{13}$          | EV1<a  | EV1<c  | EV3<a  | EV3<c | EV1<e <sub>1</sub> | EV1<e <sub>3</sub> | EV3<e <sub>1</sub> | EV3<e <sub>3</sub> |
|--------|------------------------|------------------------|------------------------|------------------------|--------|--------|--------|-------|--------------------|--------------------|--------------------|--------------------|
| 30     | $3.39 \times 10^{-6}$  | $2.21 \times 10^{-5}$  | $-1.55 \times 10^{-5}$ | $-2.90 \times 10^{-5}$ | 68.95  | 158.95 | 35.98  | 54.02 | 54.02              | 144.02             | 35.98              | 54.02              |
| 50     | $5.95 \times 10^{-6}$  | $1.74 \times 10^{-5}$  | $-8.60 \times 10^{-6}$ | $-1.71 \times 10^{-5}$ | 71.50  | 161.50 | 33.48  | 56.53 | 56.53              | 146.53             | 33.48              | 56.53              |
| 100    | $1.10 \times 10^{-5}$  | $9.26 \times 10^{-6}$  | $2.83 \times 10^{-6}$  | $2.07 \times 10^{-6}$  | 61.47  | 28.53  | 166.47 | 76.47 | 76.47              | 13.53              | 166.47             | 76.47              |
| 150    | $1.35 \times 10^{-5}$  | $5.44 \times 10^{-6}$  | $7.53 \times 10^{-6}$  | $9.64 \times 10^{-6}$  | 38.63  | 51.37  | 143.59 | 53.59 | 53.59              | 36.42              | 143.59             | 53.59              |
| 200    | $1.33 \times 10^{-5}$  | $4.56 \times 10^{-6}$  | $7.38 \times 10^{-6}$  | $9.62 \times 10^{-6}$  | 38.69  | 51.31  | 143.59 | 53.59 | 53.59              | 36.41              | 143.59             | 53.59              |
| 250    | $1.06 \times 10^{-5}$  | $5.45 \times 10^{-6}$  | $4.12 \times 10^{-6}$  | $5.41 \times 10^{-6}$  | 45.60  | 44.40  | 150.45 | 60.45 | 60.45              | 29.55              | 150.45             | 60.45              |
| 300    | $5.57 \times 10^{-6}$  | $7.11 \times 10^{-6}$  | $-7.39 \times 10^{-7}$ | $-2.81 \times 10^{-7}$ | 102.29 | 167.71 | 2.55   | 87.45 | 87.45              | 177.45             | 2.55               | 87.45              |
| 350    | $-1.21 \times 10^{-6}$ | $8.71 \times 10^{-6}$  | $-5.88 \times 10^{-6}$ | $-5.38 \times 10^{-6}$ | 71.59  | 161.59 | 33.26  | 56.74 | 56.74              | 146.74             | 33.26              | 56.74              |
| 400    | $-8.97 \times 10^{-6}$ | $9.59 \times 10^{-6}$  | $-1.02 \times 10^{-5}$ | $-8.46 \times 10^{-6}$ | 61.94  | 151.94 | 42.94  | 47.06 | 47.06              | 137.06             | 42.94              | 47.06              |
| 450    | $-1.67 \times 10^{-5}$ | $9.25 \times 10^{-6}$  | $-1.27 \times 10^{-5}$ | $-8.77 \times 10^{-6}$ | 53.59  | 143.59 | 51.34  | 38.66 | 38.66              | 128.66             | 51.34              | 38.66              |
| 500    | $-2.30 \times 10^{-5}$ | $7.36 \times 10^{-6}$  | $-1.27 \times 10^{-5}$ | $-6.19 \times 10^{-6}$ | 40.14  | 130.14 | 64.84  | 25.16 | 25.16              | 115.16             | 64.84              | 25.16              |
| 550    | $-2.64 \times 10^{-5}$ | $3.77 \times 10^{-6}$  | $-9.69 \times 10^{-6}$ | $-1.25 \times 10^{-6}$ | 19.25  | 109.25 | 85.76  | 4.23  | 4.23               | 94.24              | 85.76              | 4.23               |
| 600    | $-2.51 \times 10^{-5}$ | $-1.52 \times 10^{-6}$ | $-3.24 \times 10^{-6}$ | $4.85 \times 10^{-6}$  | 3.07   | 93.07  | 101.95 | 11.95 | 11.95              | 78.05              | 101.95             | 11.95              |
| 650    | $-1.71 \times 10^{-5}$ | $-8.34 \times 10^{-6}$ | $6.77 \times 10^{-6}$  | $1.02 \times 10^{-5}$  | 5.34   | 84.67  | 110.32 | 20.33 | 20.33              | 69.68              | 110.32             | 20.33              |
| 700    | $7.52 \times 10^{-8}$  | $-1.64 \times 10^{-5}$ | $2.03 \times 10^{-5}$  | $1.24 \times 10^{-5}$  | 10.47  | 79.53  | 115.42 | 25.42 | 25.42              | 64.58              | 115.42             | 25.42              |
| 750    | $2.89 \times 10^{-5}$  | $2.51 \times 10^{-5}$  | $3.70 \times 10^{-5}$  | $8.20 \times 10^{-6}$  | 16.91  | 73.10  | 121.80 | 31.80 | 31.80              | 58.20              | 121.80             | 31.80              |

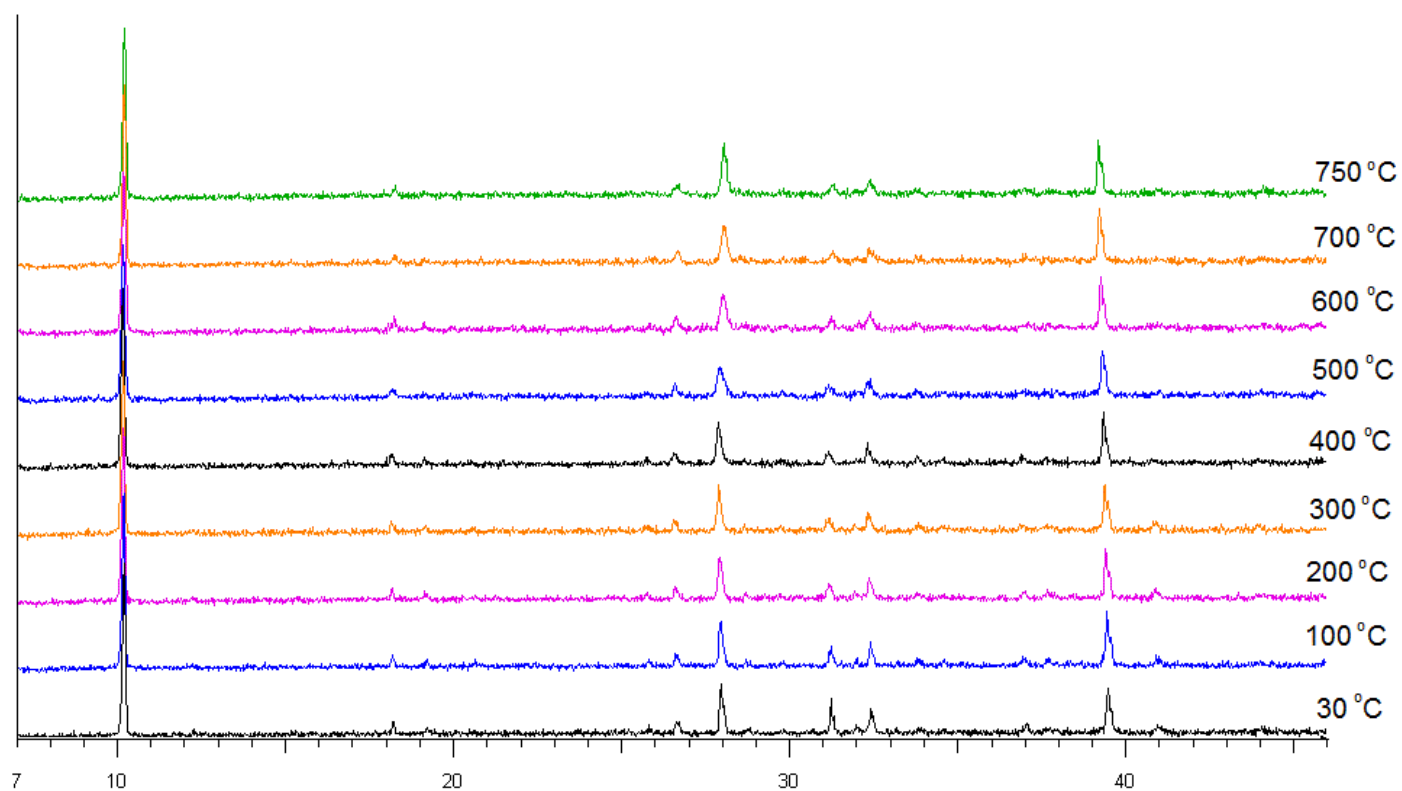

**Figure S1.** Selected XRPD patterns of potassic-hastingsite showing the evolution of the diffraction patterns collected during the heating experiment. In all patterns the 7–45°  $2\theta$  range is reported.

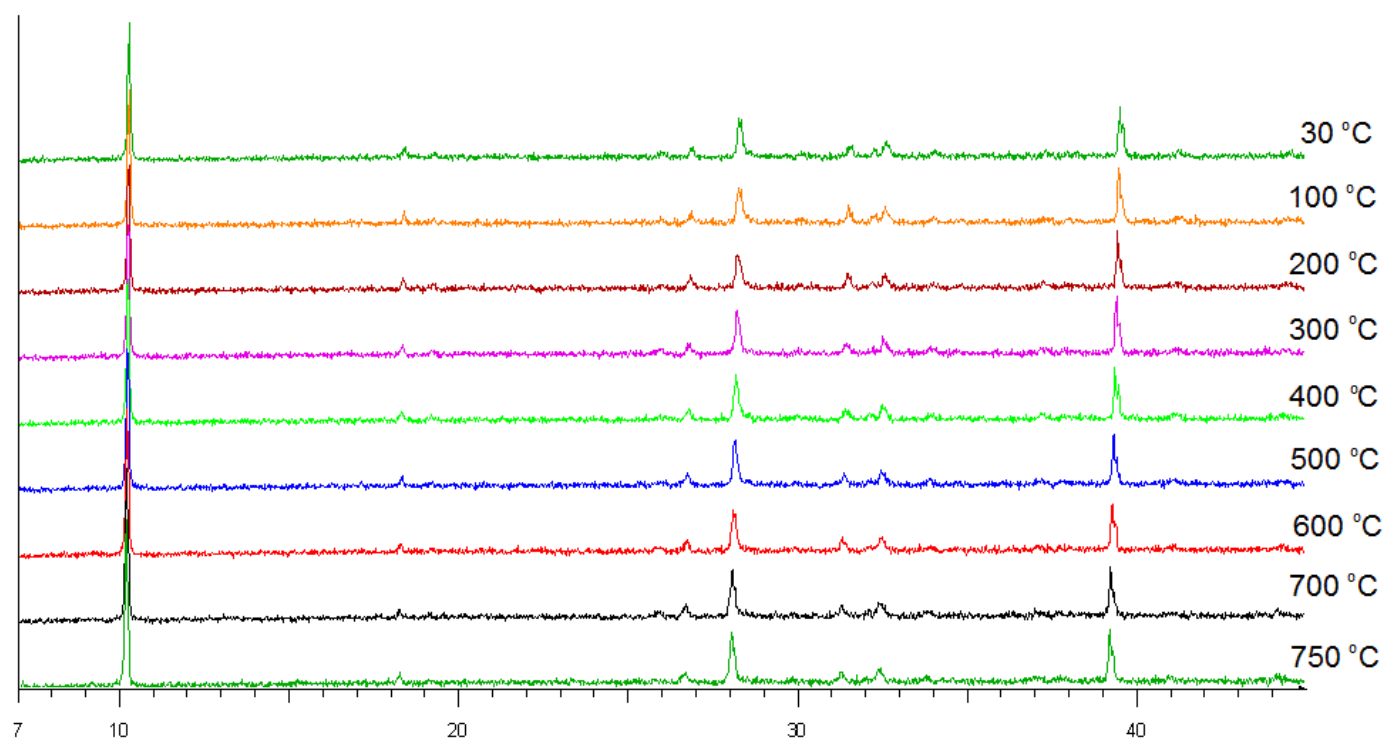

**Figure S2.** XRPD patterns of potassic-hastingsite showing the evolution of the diffraction patterns collected during the cooling experiment. In all patterns the 7–45°  $2\theta$  range is reported.

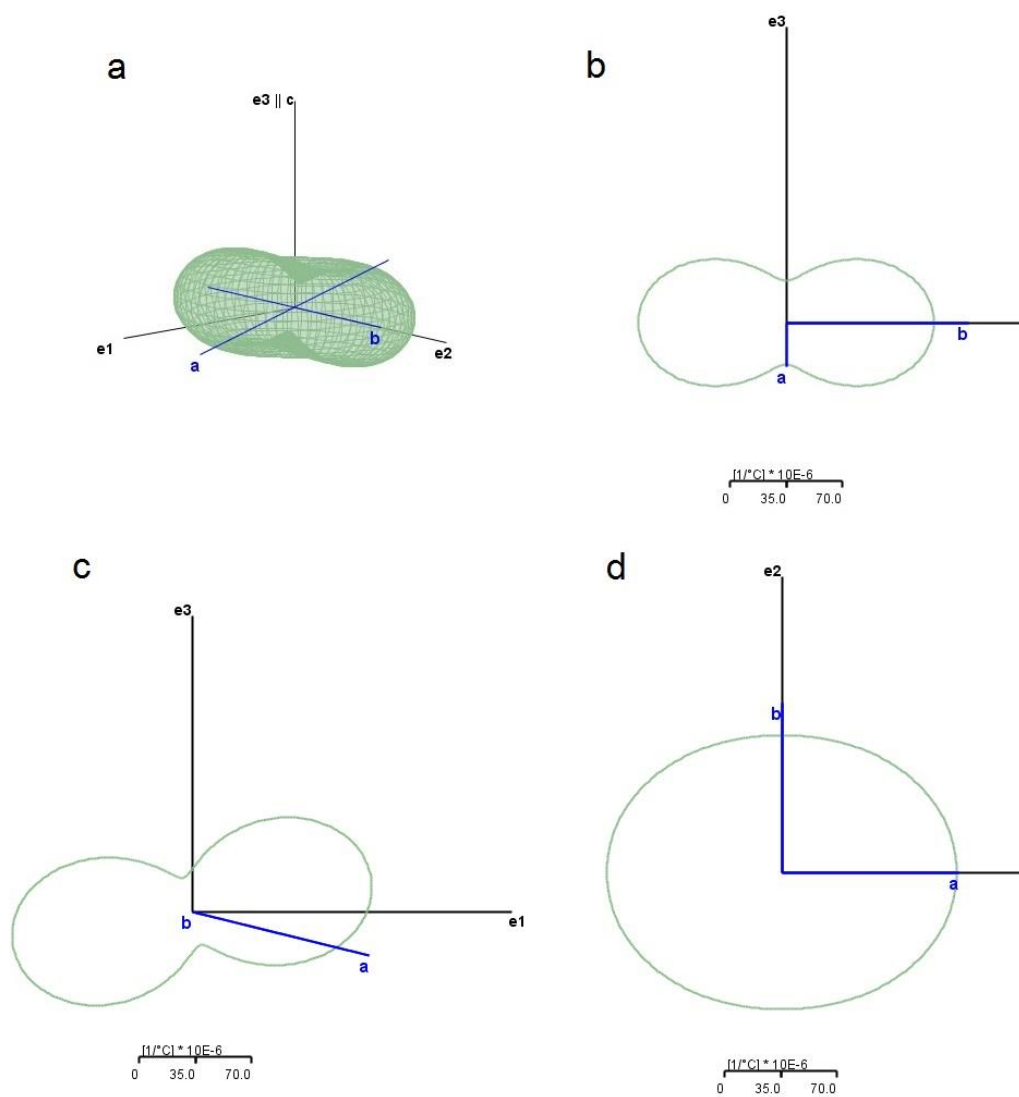

**Figure S3.** Graphical representation of the thermal expansion tensor of the potassic-hastingsite at 100°C: **a)** 3D view; **b)**  $e_2 - e_3$  section; **c)**  $e_1 - e_3$  section; **d)**  $e_1 - e_2$  section. The green and red colours represent directions of positive and negative expansion, respectively.

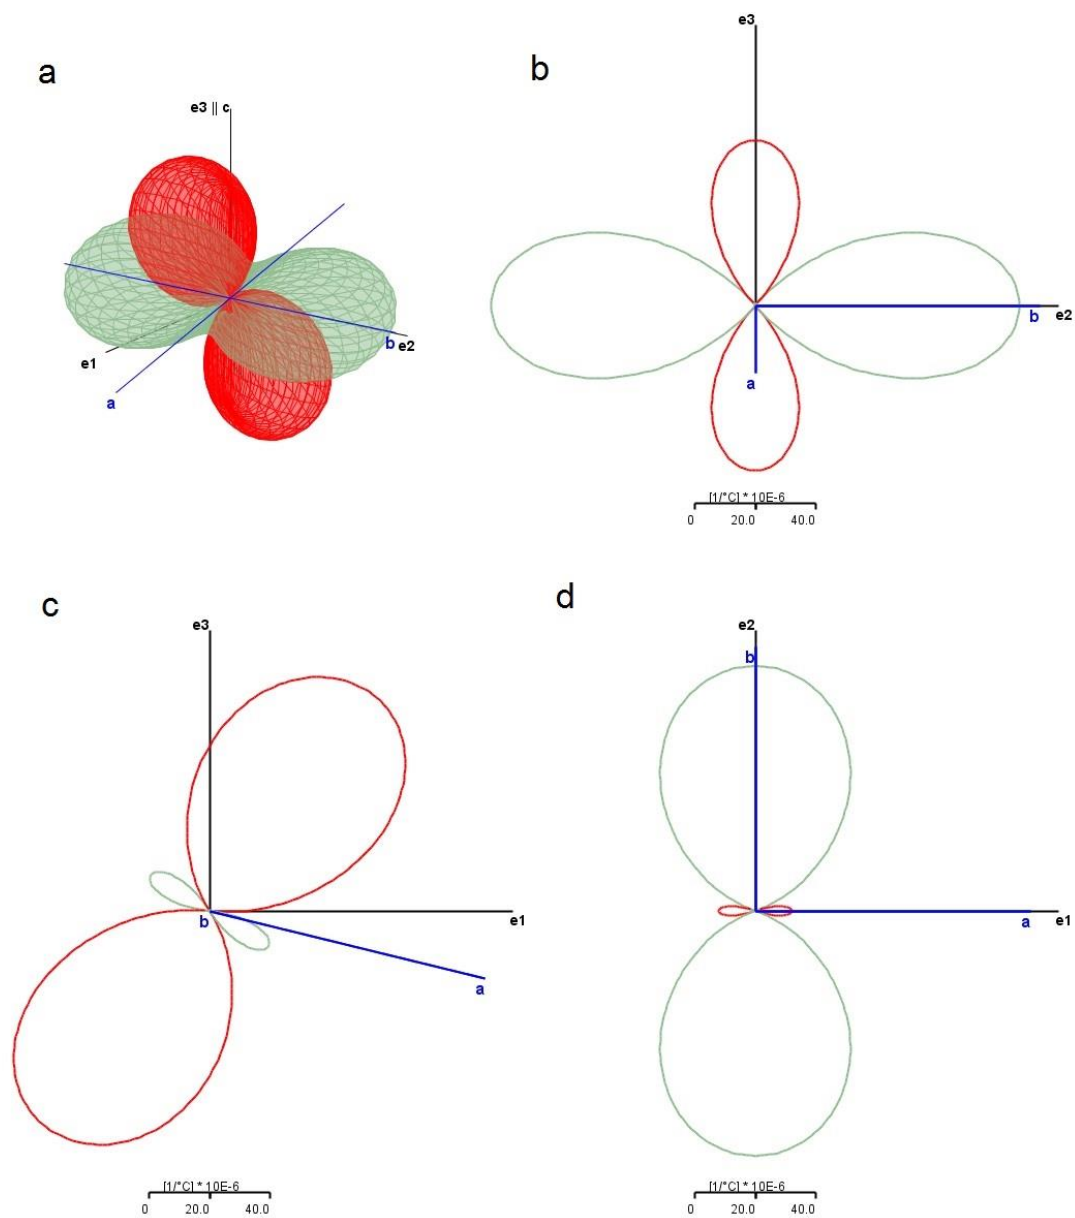

**Figure S4.** Graphical representation of the thermal expansion tensor of the potassic-hastingsite at 350°C: **a)** 3D view; **b)**  $e_2 - e_3$  section; **c)**  $e_1 - e_3$  section; **d)**  $e_1 - e_2$  section. The green and red colours represent directions of positive and negative expansion, respectively.



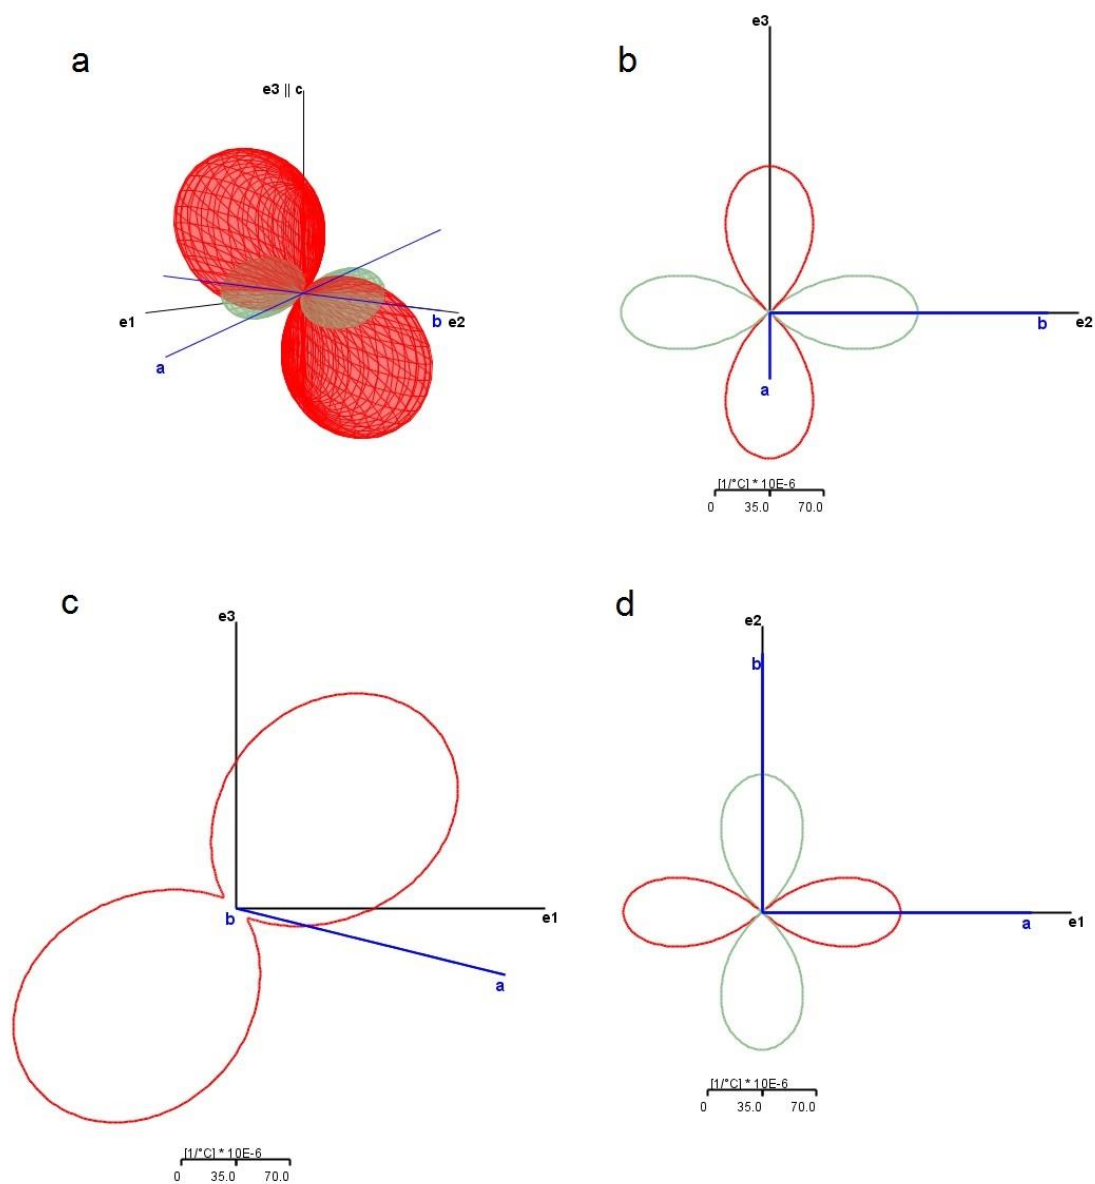

**Figure S5.** Graphical representation of the thermal expansion tensor of the potassic-hastingsite at 400°C: **a)** 3D view; **b)**  $e_2 - e_3$  section; **c)**  $e_1 - e_3$  section; **d)**  $e_1 - e_2$  section. The green and red colours represent directions of positive and negative expansion, respectively.

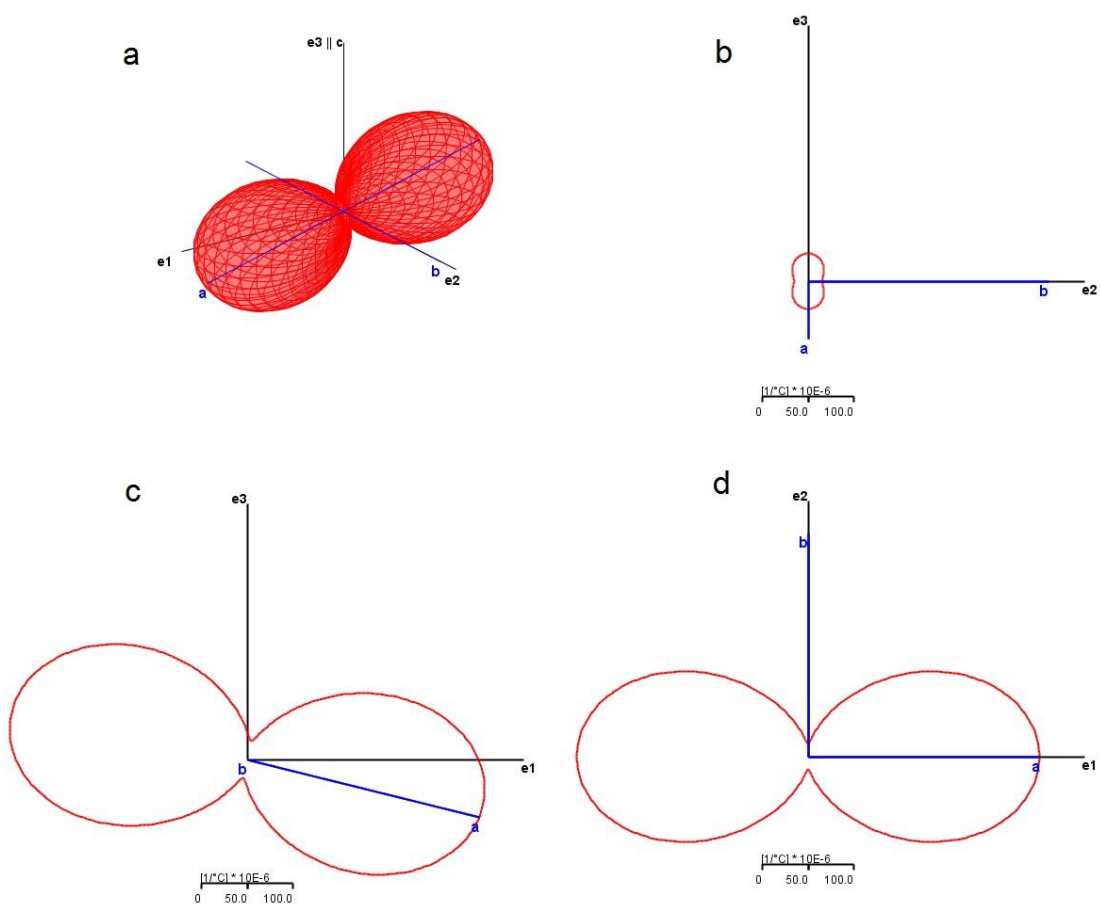

**Figure S6.** Graphical representation of the thermal expansion tensor of the potassic-hastingsite at 600°C: **a)** 3D view; **b)**  $e_2 - e_3$  section; **c)**  $e_1 - e_3$  section; **d)**  $e_1 - e_2$  section. The green and red colours represent directions of positive and negative expansion, respectively.

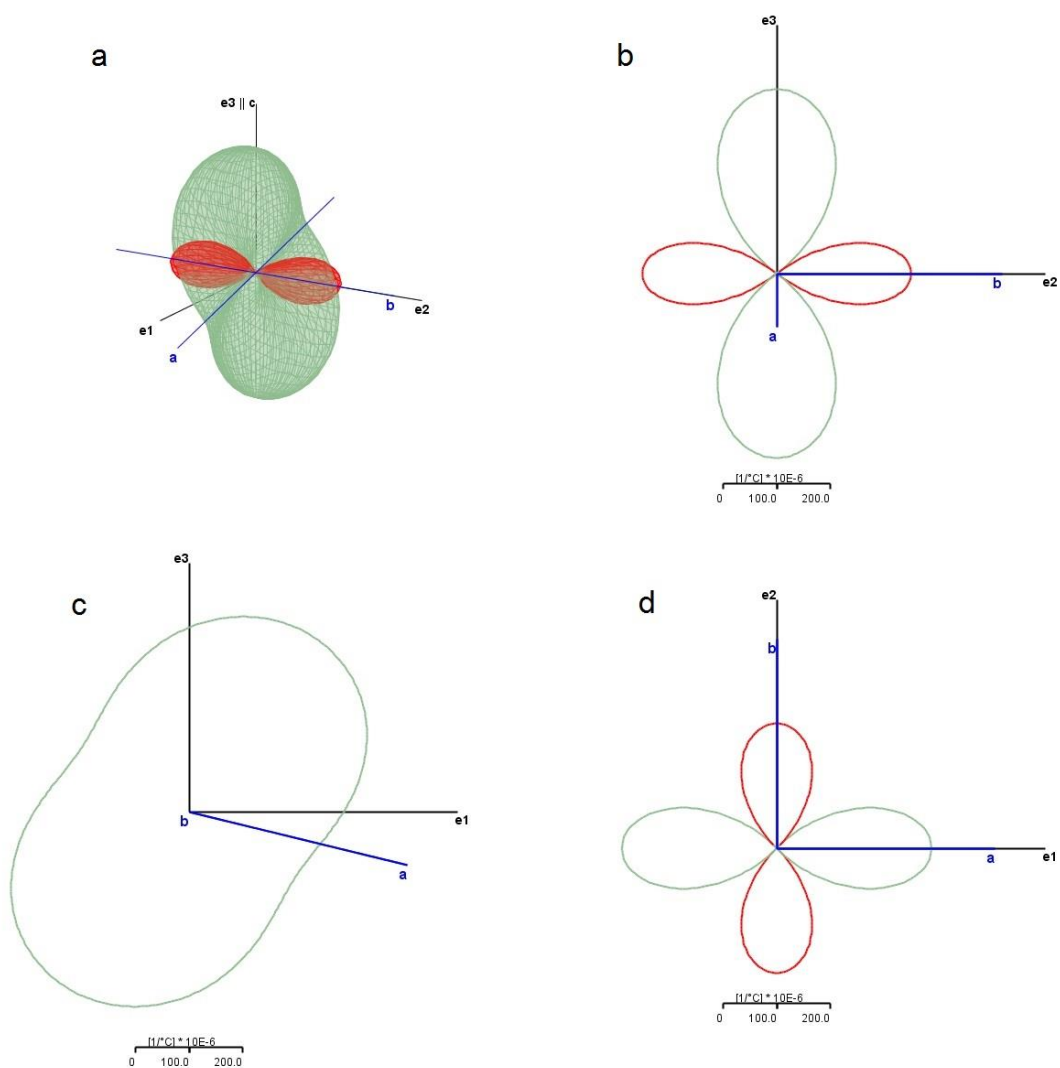

**Figure S7.** Graphical representation of the thermal expansion tensor of the potassic-hastingsite at 750°C: **a)** 3D view; **b)**  $e_2 - e_3$  section; **c)**  $e_1 - e_3$  section; **d)**  $e_1 - e_2$  section. The green and red colours represent directions of positive and negative expansion, respectively.
